# Supplementary material for: The Risk of a Mosquito-Borne Infectionin a Heterogeneous Environment
Source: PubMed Central journal article supplement (PMC524252; doi:10.1371/journal.pbio.0020368), 2004-10-26
Supplement: pbio.0020368.sd001.pdf [file pbio.0020368.sd001.pdf]

# The Risk of a Mosquito-Borne Infection in a Heterogeneous Environment: Supplementary Material

David L. Smith<sup>\*,†</sup>, Jonathan Dushoff<sup>‡†</sup>, F. Ellis McKenzie<sup>†§</sup>

September 20, 2004

## Introduction

The following version of the methods is longer and more pedagogical than the published  
3 version. The results section includes some additional analysis.

## Methods

We use mathematical models to illustrate general principles that may apply to many  
6 mosquito-borne diseases, not to make predictions about the distribution of a particular  
mosquito-borne disease. However, the models we analyze are based on the malaria models of  
Ross (Ross, 1911). We generate a suite of complex models by elaboration, adding a realistic  
9 incubation period, temporal heterogeneity, patchy space and mosquito movement, and spa-  
tial heterogeneity (Black & Singer, 1987). By comparing models, we associate an effect with  
a factor. First, we allow mosquito birth rates to vary temporally, and focus on the temporal  
12 changes in the components of EIR (Aron & May, 1982). Next, we illustrate how spatial vari-  
ability in the distribution of larval habitat generates source-sink relationships in landscapes  
and leads to variability in the spatial distribution of HBR and PIM. Then, we explore the  
15 consequences of heterogeneous human distributions. Host-seeking behavior by mosquitoes  
can produce mosquito distributions that are more (or less) aggregated than the distribution  
of humans, generating an uneven distribution in risk. Thus, we develop conceptual models  
18 to illustrate which components of the vector biology determine the distribution of risk.

Our intent is to focus on the effects of temporal and spatial heterogeneity. Consequently,  
we have used a single set of mosquito life-history parameters and a single duration of infection  
21 in humans. The parameters are roughly consistent with *Anopheles gambiae* and the infectious  
period for malaria. Moreover, we allow the distribution of mosquitoes to vary temporally or

---

\*Corresponding author: e-mail: smitdave@mail.nih.gov; phone: 301-496-1932

†Fogarty International Center, National Institutes of Health, Bethesda, MD 20892

‡dushoff@eno.princeton.edu; Ecology and Evolutionary Biology, Princeton University

§mckenzel@mail.nih.gov

spatially, and the distribution of humans may vary spatially, but HBR averaged over time or  
 24 space remains constant. Thus, all of the effects we illustrate are due to temporal fluctuations  
 in mosquito density or to changes in the spatial distribution of humans.

We use a common notation to denote the major components of *EIR*. We let  $M$  denote  
 27 the population density of mosquitoes,  $Z$  the density of infectious mosquitoes, and  $z = Z/M$   
 the proportion of mosquitoes that are infectious. We let  $a$  denote the human feeding rate,  
 the number of human bites per mosquito per day. We let  $H$  denote the population density  
 30 of humans.

The transmission dynamics of mosquito-borne diseases are complex, and it is easy to lose  
 sight of what terms such as EIR and HBR actually mean. HBR is the product of the human  
 33 feeding rate – the number of human blood meals, per mosquito, per day, denoted  $a$  – and the  
 number of mosquitoes per human (i.e.  $HBR = aM/H$ ). Therefore, when mosquito density  
 changes, HBR changes proportionally. In contrast EIR is the product of PIM and HBR (i.e.  
 36  $EIR = zHBR = azM/H$ ). Table 1 lists variable and parameter names and other important  
 terms for the models.

**Realistic Incubation Period** We first modify the Ross model by incorporating a realistic  
 39 incubation period into his simple model for the proportion of infected humans and the pro-  
 portion of infected and infectious mosquitoes. We let  $x$  denote the proportion of humans who  
 are infected and infectious. The proportion and density of infected, incubating mosquitoes  
 42 are denoted  $y$  and  $Y$ , respectively. We assume that a bite from an infectious mosquito infects  
 a host with probability  $b$ , and that each bite on an infectious host infects a mosquito with  
 probability  $c$ . We assume that the human infectious period is exponentially distributed with  
 45 average duration  $1/r$ .

We assume that the mosquito lifespan is exponentially distributed with a mean lifetime  
 of  $1/g$  days. We incorporate a realistic incubation period by subdividing the incubation  
 48 period into  $n$  stages of equal duration; the proportion of mosquitoes that are infected and  
 incubating in stage  $k$  is denoted  $y_k$ . We assume the incubation period has mean  $1/q$  days.  
 For  $n = 1$ , the probability of surviving the incubation period is  $q/(q+g)$ , and the duration of  
 51 the incubation period (for surviving mosquitoes) has an exponential distribution. For  $n > 1$ ,  
 the probability of surviving the incubation period is  $(qn/(qn+g))^n$  ( $\approx e^{-g/q}$  for large  $n$ ), and  
 the duration of the incubation period (for surviving mosquitoes) has a Gamma distribution  
 54  $G(q, n)$ , with variance  $1/(q^2n)$ . The proportion that become infectious  $t$  days after becoming  
 infected is:

$$G(q, n) = \frac{(qn)^n}{(n-1)!} t^{n-1} e^{-tqn} \quad (1)$$

57 For large  $n$ , the incubation period resembles a normal distribution centered at  $1/q$ ; the larger

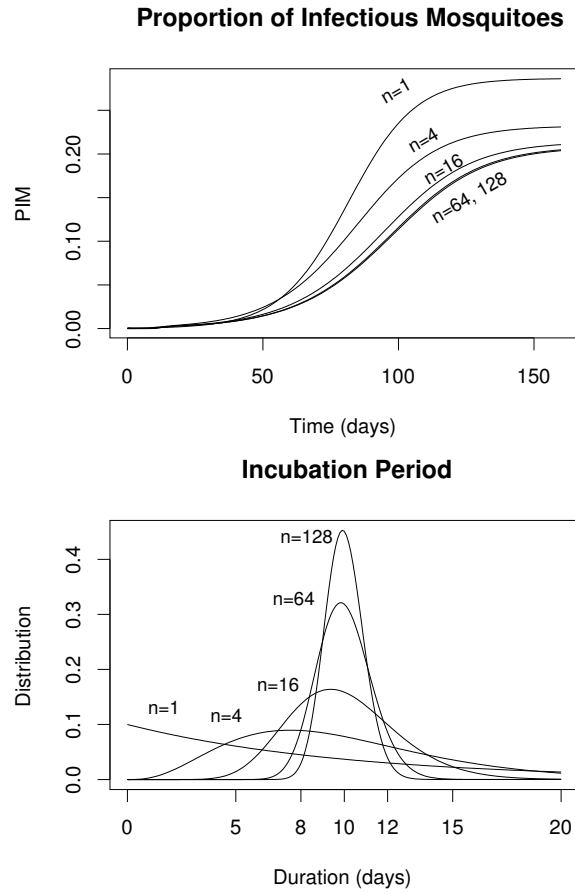

Figure 6: Numerical solutions to Eq.2 for increasingly realistic incubation periods in the mosquito, determined by the number of stages in the incubation period,  $n$ . The distribution of the corresponding extrinsic incubation periods are also plotted. For this set of parameters, the dynamics are virtually identical for  $n > 64$ .

$n$  the smaller the variance (Fig. 6). In the limit as  $n$  approaches infinity, the dynamics approach a fixed time delay. We chose  $n$  large enough for the incubation period to have a reasonably small variance, and small enough for numerical convenience. Since the distribution for  $n = 64$  appears reasonable, and since the dynamics change very little from  $n = 64$  to  $n = 128$ , we have used  $n = 64$  for all subsequent figures, unless otherwise specified.

Assuming mosquito population density is constant over time, the proportion of humans and mosquitoes that are infectious changes over time according to the set of  $n + 2$  coupled ordinary differential equations:

$$\begin{aligned}
 \dot{x} &= ab\frac{M}{H}z(1-x) - rx \\
 \dot{y}_1 &= acx(1 - \sum_k y_k - z) - (qn + g)y_1 \\
 \dot{y}_k &= qny_{k-1} - (qn + g)y_k \\
 \dot{z} &= qny_n - gz
 \end{aligned} \tag{2}$$

Numerical solutions to Eqs.2 for various values of  $n$  are illustrated in Fig. 6. The entomological parameters were chosen to resemble an efficient vector, such as *Anopheles gambiae* for malaria, ( $a = 0.3, b = c = 0.5, 1/g = 1/q = 10$  days). The ratio of mosquitoes per human ( $\frac{M}{H}$ ) was set to 2. The human infectious period for this case is 100 days ( $r = 0.01$ ), roughly consistent with malaria. Initial conditions were  $x = 0.01, y_k = z = 0$ .

**Temporal Heterogeneity** We extend the model by adding temporal variability in mosquito density. We let  $\epsilon(t)$  denote the rate adult female mosquitoes emerge from larval habitat; we do not assume that the emergence of adults is explicitly linked to the density of adult mosquitoes.

Because the mosquito population varies, it is simpler to write the equations in terms of the density of mosquitoes,  $M$ , the density of infected and incubating mosquitoes in stage  $k$ ,  $Y_k$ , and the density of infectious mosquitoes  $Z$ :

$$\begin{aligned}
 \dot{x} &= ab\frac{Z}{H}(1-x) - rx \\
 \dot{M} &= \epsilon(t) - gM \\
 \dot{Y}_1 &= acx(M - \sum_k Y_k - Z) - (qn + g)Y_1 \\
 \dot{Y}_k &= qnY_{k-1} - (qn + g)Y_k \\
 \dot{Z} &= qnY_n - gZ
 \end{aligned} \tag{3}$$

Models either employ a constant emergence rate or use the seasonal forcing function  $\epsilon(t) = Kg(1 + \sin(2\pi t/365))$ ;  $K$  is the long-term average density, sometimes called the carrying capacity. Fig. 1 was generated using  $n = 64$  and  $K = 2$ ; otherwise the parameters are the same as Fig. 6.

84 **Spatial Heterogeneity** We further extend the model by subdividing the landscape into  
a set of patches linked by the movement of mosquitoes. The subscript  $i$  is added to variable  
names to denote the value in the  $i^{\text{th}}$  patch. Thus,  $H_i$  denotes local human population density  
87 and  $x_i$  the local prevalence of infection in humans. Similarly,  $M_i$  is local mosquito population  
density, and  $Z_i$  is the density of infectious mosquitoes. The density of infected mosquitoes  
in patch  $i$  and incubation stage  $k$  is  $Y_{i,k}$ .

90 Larval habitat and human distributions form a template that determines mosquito distri-  
butions and the distribution of risk. The emergence rate of adults in the  $i^{\text{th}}$  patch is  $\epsilon_i(t)$ ; the  
emergence of adult female mosquitoes depends predictably on time and location. Following  
93 emergence, female mosquitoes spread into surrounding areas seeking blood hosts; they feed,  
oviposit and then repeat the cycle. We assume that heterogeneity in larval habitat takes the  
form of differences in quality rather than availability of habitat, *per se*. In other words, we  
96 assume that suitable sites for oviposition are distributed throughout the habitat, but that  
patches may vary in the successful development of adults.

We assume that mosquitoes are more likely to stay in a patch if they encounter a human,  
99 and that they are more likely to find humans where humans are more abundant. We let  
 $\phi(H_i)$  denote the per-capita emigration rate of mosquitoes away from patch  $i$  regardless of  
infection status. We assume that  $\phi(H)$  is a decreasing function of  $H$ ; the more humans,  
102 the less likely mosquitoes are to leave a patch in search of another blood-meal host. Thus,  
mosquitoes move more rapidly through patches with low human densities. A parameter,  
 $\kappa_{i,j}$ , describes the fraction of mosquitoes leaving patch  $i$  that fly to patch  $j$ , and  $\sum_j \kappa_{i,j} = 1$ .  
105 Thus, the rate that mosquitoes move from patch  $i$  to patch  $j$  is  $\phi(H_i)\kappa_{i,j}M_i$ .

The transmission dynamics are described by the following set of equations:

$$\begin{aligned}
\dot{x}_i &= ab\frac{Z_i}{H_i}(1 - x_i) - rx_i \\
\dot{M}_i &= \epsilon_i(t) - gM_i - \phi(H_i)M_i + \sum_j \kappa_{i,j}\phi(H_j)M_j \\
\dot{Y}_{i,1} &= acx_i(M_i - \sum_k Y_{i,k} - Z_i) - (g + qn)Y_{i,1} - \phi(H_i)Y_{i,1} + \sum_j \kappa_{i,j}\phi(H_j)Y_{j,1} \\
\dot{Y}_{i,k} &= qnY_{i,k-1} - (g + qn)Y_{i,k} - \phi(H_i)Y_{i,k} + \sum_j \kappa_{i,j}\phi(H_j)Y_{j,k} \\
\dot{Z}_i &= qnY_n - gZ_i - \phi(H_i)Z_i + \sum_j \kappa_{i,j}\phi(H_j)Z_j
\end{aligned} \tag{4}$$

108 This patch-based modeling framework is suitable for modeling an array or grid of contiguous  
habitat or an arbitrary network of patches. We focus on the relatively simple patterns that  
form along a spatial transect, a linear array of seventeen patches that can be thought of as  
111 a long, rectangular island. We have assumed that  $\kappa_{i,j} = 0$  unless two patches are adjacent.  
We assume that no humans live in the patches at the extreme ends of the transect, and  
that all of the mosquitoes leaving one of these edges return to the adjacent patch; thus  
114  $\kappa_{1,2} = \kappa_{17,16} = 1$ , a reflective boundary. Otherwise, we assume that mosquitoes move in

either direction at random; thus,  $\kappa_{i,j} = 0.5$  for  $i = 2 \dots 16$  and  $j = i \pm 1$ . Mosquito migration was described by the function  $\phi(H_i) = \zeta e^{-\theta H_i}$ . In Figs. 2-4, we used  $\zeta = 10$  and  $\theta = 4$ .  
 117 These correspond to a maximum daily flight distance (i.e. without humans) of about 10 patches per day.

We assume that humans do not move among patches. The density of humans and the  
 120 productivity of the larval habitat may vary over space. As we change the distribution of humans and larval habitat to explore the effects of spatial heterogeneity, we hold the total emergence rate of adult mosquitoes per human constant; only the distribution of humans  
 123 and adult emergence changes.

Adult mosquito emergence for Figs. 2 and 4 was  $gK(P - 2)$  in patch 1 ( $K = 2$  and  $P = 17$ ), no adults emerged within other patches. The adult emergence rate for Fig. 3  
 126 was  $gK$  in each patch with humans (2 – 16). Adult emergence rate for Fig. 7 was  $gK(P - 2)(1 + \sin(2\pi t/365))$  in patch 1; no mosquitoes emerged within other patches.

For Fig. 2, human density was 1 in patches 2 – 16. For Fig. 3, human density was 0.2  
 129 in patches 2 – 6, 1.8 in patches 7 – 11, and 1 in patches 12 – 16. For Figs. 4 and 7 human density was  $(0, 1, 2, 3, \dots, 15, 0)/120$ . Otherwise, the parameters were the same as Fig. 1.

## Results

132 **Temporal Heterogeneity** Fluctuating mosquito density affects EIR through changes in HBR; transmission increases as mosquito density increases. Following an increase in the rate at which adult mosquitoes emerge, mosquito density and HBR peak (illustrated in  
 135 Fig. 1). The peak in EIR and the density of infected mosquitoes follows the peak in mosquito density because it takes time for an infectious agent to spread through the human and mosquito populations. Increased HBR leads to secondary increases in the proportion of  
 138 infected humans, and thus to increases in PIM. As the density of infected mosquitoes declines, decreasing transmission is followed by a decline in the prevalence of infection in humans.

In contrast, larger fluctuations in PIM are generated by the shifting age distribution in  
 141 fluctuating mosquito populations. Adults emerge uninfected, but they become infected some time after biting infectious humans. Growing populations are dominated by young, uninfected mosquitoes, while shrinking populations are dominated by older mosquitoes. Since  
 144 the proportion of mosquitoes that are infected and infectious increases with the age of the mosquito, PIM is a proxy for the age distribution of mosquito populations. While populations decline, surviving mosquitoes continue to bite and oviposit but few young mosquitoes  
 147 emerge, so declining populations have a larger fraction of old mosquitoes. Thus, PIM increases during the dry season as mosquito populations, HBR and EIR decline.

**Spatial Heterogeneity** The distribution of adults is determined by the distribution of larval habitat, the distribution of blood hosts, and the alternating activities of blood-meal-seeking and oviposition. When mosquito emergence rates and human population distributions are constant over time, the distribution of mosquitoes reaches a static spatial distribution. We focus on the patterns that form along a transect.

In Fig. 2, we assume a single point-source for mosquitoes and a homogeneous distribution of humans. In Fig. 3, the same number of adult mosquitoes emerges, but the spatial distribution of larval emergence is uniform and the distribution of humans varies. We assume that human density is low at one end, high at intermediate distances, and intermediate at the opposite end, approximating a small town with fewer dwellings on the edge nearest a swampy area. In Fig. 4 we combine the two kinds of spatial heterogeneity. Finally, Fig. 7 combines the temporal pattern of of Fig. 1 with the spatial distributions of Fig. 4.

**Gradients in EIR away from Larval Habitat** When mosquitoes emerge from a point source, the density of mosquitoes tends to decline away from larval habitat, such as a gradient along a transect away from a swamp or river (Fig. 2a). The shape of the gradient is determined by the emergence rate of adult mosquitoes, the mortality of existing mosquitoes, and random drift away from the source. In contrast, PIM increases monotonically away from the source due to a shift in the age-distribution and parity of mosquitoes (Fig. 2a). Young mosquitoes tend to be close to their birthplace because they have moved less; older mosquitoes have moved more and so are dispersed further from the source, on average. The spatial distribution of HBR and EIR reflect the gradients in mosquito density, not the gradient in PIM (Fig. 2a,b). The prevalence of infection in humans declines monotonically (Fig. 2c).

**Heterogeneous Distributions of Humans** When human populations are distributed heterogeneously, but the larval habitat of mosquitoes is distributed uniformly, adult mosquito distributions become heterogeneous because mosquitoes tend to aggregate around humans. This may or may not lead to an increase in HBR, depending on whether mosquito distributions become more aggregated than the distribution of their human hosts. HBR tends to increase when mosquitoes move rapidly through sparse human populations and stay in areas with dense populations. Thus, mosquito distributions tend to become more aggregated than human distributions when the mosquito species is long-lived with long daily flight distances (see below).

We illustrate this principle for one particular set of parameters that leads to increased mosquito aggregation. The human population is distributed heterogeneously in blocks of low, high, and medium density, approximating a town with a rural population on one side

and an intermediate density population on the other. The distribution of adult mosquitoes is influenced by the distribution of humans (Fig. 3a). Aggregations of mosquitoes form spontaneously at the edges of human settlements simply because mosquitoes tend to move until they find a host. We note that HBR peaks away from town where human population density is lowest and at the edge of town where human population density is highest (Fig. 3b). EIR also peaks at the edge of town, but it is lowest on the low human density side of town. These movement rules guarantee that the mosquitoes found on the side of town with low human density will tend to be younger, hence PIM is low (Fig. 3a). The prevalence of infection in humans is lowest overall in the patches with low human density (Fig. 3c). This model also makes other surprising predictions—the risk of infection is lowest just outside of the edge of town; the sharp difference in human density at the edge leads to a strong tendency for mosquitoes to be drawn into rather than away from town, decreasing HBR and PIM (Fig. 3b,c).

**Heterogeneous Larval Habitat and Human Population** When mosquitoes and humans are distributed unevenly, the distribution of mosquitoes and risk may be dominated by either proximity to larval habitats and gradients away from them or by the tendency of mosquitoes to aggregate around humans. The realized pattern depends on the relative distribution of larval habitat and humans, and whether mosquito aggregation around humans increases HBR. We illustrate one kind of pattern for parameters that lead to increased HBR. In this case, human density increases away from larval habitat. The density of mosquitoes peaks a short distance from the source, and the density of infected mosquitoes peaks slightly further away (Fig. 4a). HBR declines monotonically away from the source, but EIR peaks at an intermediate distance (Fig. 4b). The density of infected humans peaks well away from the source, but the fraction of infected humans remains relatively constant near the source, declining abruptly well away from the source (Fig. 4c). Despite the sharp peaks in risk, PIM displays a robust monotonic increase with distance away from the source (Fig. 4a). If the gradient were reversed, so that human density decreases with the distance away from larval habitat, mosquitoes would remain close to the source and mosquito aggregation would be exaggerated, compared with Fig. 2 (not illustrated).

**Spatio-Temporal Heterogeneity** When the emergence rate of adult mosquitoes varies seasonally (as in Fig. 1), and mosquito larval habitat and humans are distributed heterogeneously (as in Fig. 4), the spatial and temporal patterns are waves focused around mosquito sources. During the wet season, the mosquito population, and hence HBR, expands outward from the source; EIR and the prevalence of human infection follow after brief temporal and spatial lags. As the mosquito population contracts in the dry season, the prevalence of infec-



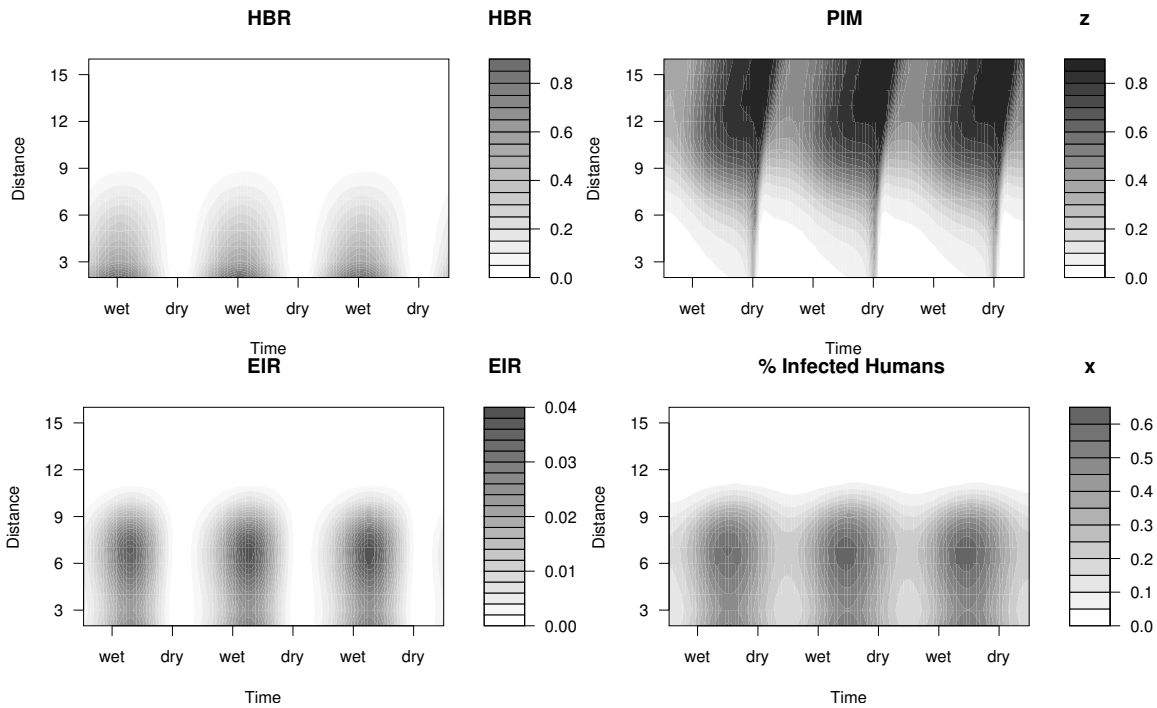

Figure 7: With spatial and temporal heterogeneity, HBR, EIR, and the prevalence of infection in humans tend to expand away from the source in the wet season and contract back toward the source in the dry season. The distribution of humans is heterogeneous, as in Fig. 4, leading to a peak in the risk of infection at a point away from larval habitat. In contrast, PIM peaks far away from the source during the dry season. The ticks on the x-axis mark the peak of the wet or dry season.

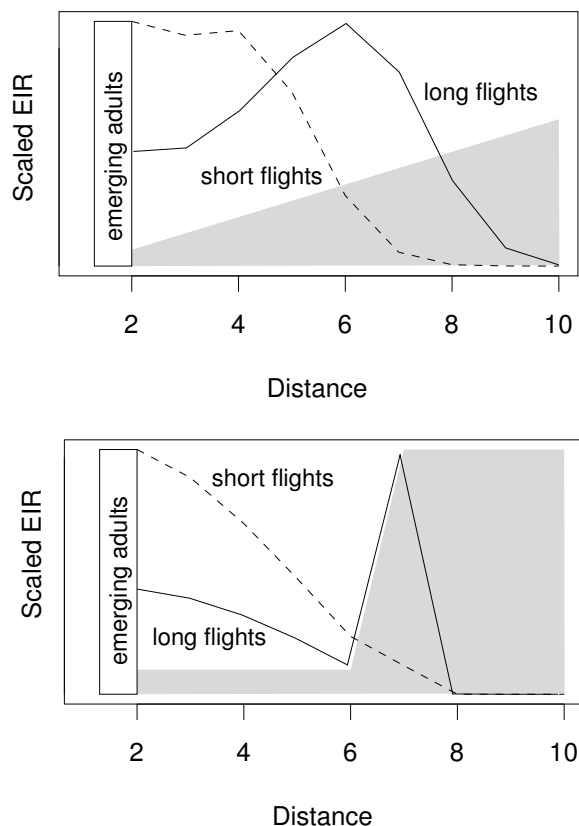

Figure 8: The distribution of risk is affected by the maximum flight distances of mosquitoes. The distribution of EIR reflects the distribution of larval habitat for mosquitoes with short flight distances (dashed), but they come to resemble the distribution of humans for mosquitoes with long flight distances (solid). In order to make comparisons about the distribution of EIR, EIR was scaled; EIR was higher overall when the flight distances were shorter.

219 tion in humans declines. The prevalence of infection in mosquitoes remains high during the  
 dry season and away from the source, until the population begins to expand again. For this  
 set of parameters, the dry-season reservoir of the infectious agent is the human population.  
 222 Despite the fact that the prevalence of infection in mosquitoes is high away from the source,  
 mosquitoes remain relatively rare.

**Sensitivity Analysis** The patterns illustrated in Figs. 2-4,7 are based on a single set of  
 225 entomological parameters in order to facilitate comparisons in situations in which only the  
 distribution of mosquitoes and hosts vary. The distribution of risk will change for different  
 values of the parameters. We explored the effects of mosquito movement and the duration  
 228 of incubation period on the distribution of risk (below, and in the supplementary materials).

The tendency of mosquitoes to aggregate at the edges of a town or away from larval

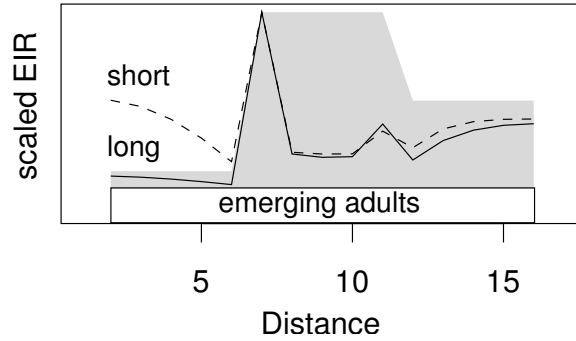

Figure 9: The distribution of risk in heterogeneous environments is affected by the duration of the incubation period. In either case, EIR peaks at the edge of town. For a long incubation, EIR is lower on the side of town where the human population density is lower (solid). The reverse is true for mechanical transmission or a short incubation period (dashed,  $q = 10$ ,  $n = 3$ ). In both cases, HBR outside of town is higher on the low-density side, but when the incubation period is long, mosquitoes migrate away before becoming infectious. In order to make comparisons about the distribution of EIR, EIR was scaled; EIR was higher overall when the incubation period was shorter.

habitat depends on mosquito searching behavior and demography (Fig. 8). Three important  
 231 parameters that affect these patterns are the maximum daily flight distance of a mosquito,  
 mosquito longevity, and mosquito searching efficiency. The distribution of a mosquito cohort  
 initially reflects the distribution of larval habitat. As mosquitoes search for hosts, the distri-  
 234 bution of the cohort shifts to reflect the distribution of human hosts. These tendencies are  
 also reflected in the static spatial distributions of mosquitoes. The distribution of long-lived  
 mosquitoes with long daily flight distances will tend to reflect the underlying distribution of  
 237 humans, while the distribution of short-lived mosquitoes with short flight distances will tend  
 to reflect the distribution of larval habitat. Mosquito searching efficiency determines the rel-  
 ative rates of movement through habitats that vary in human density. A strong tendency for  
 240 mosquitoes to aggregate at the edges of dense human populations occurs when mosquitoes  
 move quickly through areas that are sparsely populated by humans and linger in areas that  
 are heavily populated. In other words, mosquitoes tend to become more aggregated than  
 243 their hosts, increasing HBR, when mosquito searching is relatively inefficient at low human  
 densities.

The distribution of relative risk also changes with the period required for incubation of  
 246 the infectious agent, with mechanically-transmitted agents at one extreme. All else equal,  
 HBR is higher in areas in which human density is low, since human population density is in  
 the denominator of HBR. On the other hand, HBR may decline in low-human-density areas  
 249 because mosquitoes tend to move up a gradient of human population density in search of a

blood-meal host. Such migration will tend to lower the average age of mosquitoes in low-human-density patches, especially near the edge of a town (Fig. 9). This will tend to lower PIM for infectious agents with a long incubation period. In contrast, PIM for mechanically transmitted infectious agents will not be as strongly affected, so in comparison, the relative risk may be higher at that same edge of town.

## References

Ross, R. 1911. *The prevention of malaria*. John Murray, London.

Black, FL & Singer, B. 1987. Elaboration versus simplification in refining mathematical models of infectious disease. *Ann. Rev. Microbiol.* 41, 677–701.

Aron, JL & May, RM. 1982. The population dynamics of malaria. In *Population Dynamics and Infectious Disease*, (Anderson, RM, ed.), chapter 5, pp. 139–179. Chapman and Hall.

Krantz, SG. 1999. *Handbook of Complex Analysis* p. 118. Boston, MA: Birkhäuser. Formula 9.1.3.

Ruel, JJ & Ayres, MP. 1999. Jensen's inequality predicts effects of environmental variation. *Trends in Ecology and Evolution*, 14, 361–366.
